# Supplementary material for: Molecular Cloning and Expression Profiling of CncC in Bactrocera dorsalis Hendel
Source: MDPI journal article supplement (doi:10.3390/insects13090785), 2022-08-30
Supplement: s1 [file s1]

|                                |                                                                                                                       |      |
|--------------------------------|-----------------------------------------------------------------------------------------------------------------------|------|
| Homo sapiens-Nrf2              | GHRTFF.....TKDR....HSSRLAHLTRDELAKALHGFVEVDYDNLVDFENMMSHQQINPQQAARDIRRRGKNKVAAQCCKRRRLINIVGEGDLIDHLKDEKELIKERG        | 528  |
| Scophthalmus maximus-Nrf2      | GHNNAFF.....TKDR....LKRRSRVRLPRDEORAKALVGLSDVDYDNLVDFENMMSHQQINPQQAARDIRRRGKNKVAAQCCKRRRLINIVGEGDLIDSLKDEKELIKERS     | 549  |
| Ctenopharyngodon idella-Nrf2   | GYSPFF.....TKDR....CKRRSEARLSRDEORAKALQPTFVDYDNLVDFENMMSHQQINPQQAARDIRRRGKNKVAAQCCKRRRLINIVGEGDLIDSLKDEKELIKERS       | 532  |
| Mus musculus-Nrf2              | GHQKAF.....TKDR....HSSRLAHLTRDELAKALHGFVEVDYDNLVDFENMMSHQQINPQQAARDIRRRGKNKVAAQCCKRRRLINIVGEGDLIDHLKDEKELIKERG        | 536  |
| Danio rerio-Nrf2               | GHSPFF.....TKDR....LKRRSEARLSRDEORAKALQPTFVDYDNLVDFENMMSHQQINPQQAARDIRRRGKNKVAAQCCKRRRLINIVGEGDLIDSLKDEKELIKERS       | 525  |
| Mauremys reevesii-Nrf2         | GHFKAF.....TKDR....FSHYLEAHLTRDEORAKALHGFVEVDYDNLVDFENMMSHQQINPQQAARDIRRRGKNKVAAQCCKRRRLINIVGEGDLIDHLKDEKELIKERG      | 530  |
| Xenopus laevis-Nrf2            | GYSKAF.....AKDR....SLNLQEARTRDEORAKALVGLSDVDYDNLVDFENMMSHQQINPQQAARDIRRRGKNKVAAQCCKRRRLINIVGEGDLIDSLKDEKELIKERG       | 530  |
| Gallus gallus-Nrf2             | GHFKAF.....TKDR....PSGRLEAHLTRDEORAKALHGFVEVDYDNLVDFENMMSHQQINPQQAARDIRRRGKNKVAAQCCKRRRLINIVGEGDLIDHLKDEKELIKERG      | 522  |
| Bactrocera dorsalis-CncC       | ARDKLS.....TSSSKSSKSVNGEELHLTRDEKARALNGLIAVSDYDNLVDFENMMSHQQINPQQAARDIRRRGKNKVAAQCCKRRRLINIVGEGDEKVEKVRERELHSDRD      | 960  |
| Micromelalopha troglodyta-CncC | .....RDLVQLQDNLVDFENMMSHQQINPQQAARDIRRRGKNKVAAQCCKRRRLINIVGEGDEKVEKVRERELHSDRD                                        | 363  |
| Plutella xylostella-CncC       | RLTDGM.....SDGSSAT...SSRQHSFDEKAKALHGLEVDYDNLVDFENMMSHQQINPQQAARDIRRRGKNKVAAQCCKRRRLINIVGEGDEKVEKVRERELHSDRD          | 653  |
| Drosophila melanogaster-CncC   | VATITASGASAGNSSVGGSSNLEELHLTRDEKARALNGLIAVSDYDNLVDFENMMSHQQINPQQAARDIRRRGKNKVAAQCCKRRRLINIVGEGDEKVEKVRERELHSDRD       | 1242 |
| Ceratitis capitata-CncC        | ARDKLS.....TSSSKSSKSVNGEELHLTRDEKARALNGLIAVSDYDNLVDFENMMSHQQINPQQAARDIRRRGKNKVAAQCCKRRRLINIVGEGDEKVEKVRERELHSDRD      | 1202 |
| Aedes aegypti-CncC             | GANWFQ.....TRDKRIK...AEZEHLTRDEKARALHGLEVDYDNLVDFENMMSHQQINPQQAARDIRRRGKNKVAAQCCKRRRLINIVGEGDEKVEKVRERELHSDRD         | 901  |
| Tribolium castaneum-CncC       | GAMQFV.....SRDRTSK...MGDEHLTRDEKARALNGLIAVSDYDNLVDFENMMSHQQINPQQAARDIRRRGKNKVAAQCCKRRRLINIVGEGDEKVEKVRERELHSDRD       | 679  |
| Nasonia vitripennis-CncC       | GALQFV.....SRDRTSK...MGDEHLTRDEKARALNGLIAVSDYDNLVDFENMMSHQQINPQQAARDIRRRGKNKVAAQCCKRRRLINIVGEGDEKVEKVRERELHSDRD       | 946  |
| Apis mellifera-CncC            | GSQFV.....SRDRTSK...MGDEHLTRDEKARALNGLIAVSDYDNLVDFENMMSHQQINPQQAARDIRRRGKNKVAAQCCKRRRLINIVGEGDEKVEKVRERELHSDRD        | 743  |
| Bactrocera tryoni-CncC         | ARDKLS.....TSSSKSSKSVNGEELHLTRDEKARALNGLIAVSDYDNLVDFENMMSHQQINPQQAARDIRRRGKNKVAAQCCKRRRLINIVGEGDEKVEKVRERELHSDRD      | 837  |
| Consensus                      | p v i nlp fne sk e q l l r d i r r r g k n k v a a q c k r r k i l                                                    |      |
| Homo sapiens-Nrf2              | ENDKSLHLKQLSTIYLEGSMIDGDEKPYFSSEYSLQTR.DGNVFLV...PKSKKEEVKKN.....                                                     | 589  |
| Scophthalmus maximus-Nrf2      | QNITLREKMQQLNSTIYLEGSRPRDEKNSFSFSDYSLQST.EGSIFLV...PRIKTLIKREENHLSPM.....                                             | 617  |
| Ctenopharyngodon idella-Nrf2   | ERSTSLREKMQQLNSTIYLEGSMIDGDEKPYFSSEYSLQTR.DGTVFLV...ERLKLTLVKN.....                                                   | 593  |
| Mus musculus-Nrf2              | ENDKSLHLKQLSTIYLEGSMIDGDEKPYFSSEYSLQTR.DGNVFLV...PKSKKEEDTKKN.....                                                    | 597  |
| Danio rerio-Nrf2               | ERSSNLREKMQQLNSTIYLEGSMIDGDEKPYFSSEYSLQTR.DGTVFLV...ERLKLTLVKN.....                                                   | 596  |
| Mauremys reevesii-Nrf2         | ENDKSLHLKQLSTIYLEGSMIDGDEKPYFSSEYSLQTR.DGTIPLV...PKSKKEETFF.....                                                      | 590  |
| Xenopus laevis-Nrf2            | EYNNLSLGLKXNLGNLMEVGNPDGDEKPYFSSEYSLQTR.KENIFLV...PKTKVSTIKK.....                                                     | 591  |
| Gallus gallus-Nrf2             | ENDKSLRQMKQLITILEGSMIDGDEKPYFSSEYSLQTR.DGNIFLV...PKSKKEETKL.....                                                      | 582  |
| Bactrocera dorsalis-CncC       | SLNLEKRLISNKFAMHRRHFGQNDGDEKPYFSSEYSLQTR.DGSIYLL...RKSDATNGSGNISNSSTSSSSSGSGSVSTLLSHNGMSFQQQQQQOQHAMLGTATHLQQHHHHHNA  | 1077 |
| Micromelalopha troglodyta-CncC | QLLAERQVRFKFAHRRHFGQNDGDEKPYFSSEYSLQTR.DGNVFLV...PKMQHHDHFMNRS....SDDMDRKAKSYDQ.....                                  | 441  |
| Plutella xylostella-CncC       | NLLAEQVRFKFAHRRHFGQNDGDEKPYFSSEYSLQTR.DGNVFLV...PKMQHHDHFMNRT....SDDMDRKAKSYDQ.....                                   | 731  |
| Drosophila melanogaster-CncC   | HLESEKRLISNKFAMHRRHFGQNDGDEKPYFSSEYSLQTR.DGSIYLL...RKSDATNTGNGASNSSTSSSSSGSGSS.SAGGGGGGGAAGVNGHTMNRHNGVSFQQQHAMLGAAT  | 1318 |
| Ceratitis capitata-CncC        | SLTLERKRLISNKFAMHRRHFGQNDGDEKPYFSSEYSLQTR.DGSIYLL...RKSDATNTGNGASNSSTSSSSSGSGSS.SAGGGGGGGAAGVNGHTMNRHNGVSFQQQHAMLGAAT | 1318 |
| Aedes aegypti-CncC             | IIQTERKRLISNKFAMHRRHFGQNDGDEKPYFSSEYSLQTR.DGTVFLV...ERSVRQQDLTGSN....HQQQQQQLGAGGGGGGLPHSHHQOQHLLHQQHQPSSQQHHHGGSS    | 1013 |
| Tribolium castaneum-CncC       | YVITGECQRMKQYQQLHRRHFGQNDGDEKPYFSSEYSLQTR.DGSIYLLV...ER...SNSTMTNFE....HKEFFPGQHRD.....                               | 751  |
| Nasonia vitripennis-CncC       | YMLIEQVRFKFAHRRHFGQNDGDEKPYFSSEYSLQTR.DGSIYLLV...ER...NQTFPHFER....STIMEFATKEDFEHKE.....                              | 1033 |
| Apis mellifera-CncC            | FMLIEQVRFKFAHRRHFGQNDGDEKPYFSSEYSLQTR.DGSIYLLV...ER...NQTFPHFER....STIMEFATKEDFEHKE.....                              | 820  |
| Bactrocera tryoni-CncC         | SLALEKRLISNKFAMHRRHFGQNDGDEKPYFSSEYSLQTR.DGSIYLL...RKSDATNGSGNISNSSTSSSSSGSGSVSTLLSHNGMSFQQQQQQOQHAMLGTATHLQQHHHHHNA  | 952  |
| Consensus                      | l f l d g lq g                                                                                                        |      |

Figure S1. Multiple sequence alignment of conserved regions of insect CncC and Nrf2 from other species. Identical and highly conserved amino acids are indicated by black (100%), pink (75%), and blue (50%), respectively.
