# Supplementary material for: Molecular Cloning and Expression Profiling of CncC in Bactrocera dorsalis Hendel
Source: MDPI journal article supplement (doi:10.3390/insects13090785), 2022-08-30
Supplement: s1 [file s1]

**Table S1 Sequences of insect *CncC* and *Nrf2* from other species for the phylogenetic analysis.**

**>*Homo sapiens-Nrf2* (AAB32188.1)**

MDLIDILWRQDIDLGVSREVFDFSQRRKEYELEKQKKLEKERQEQLQKEQEK  
AFFTQLQLDEETGEFLPIQPAQHTQSETSGSANYSQVAHIPKSDALYFDDCMQ  
LLAQTFPFVDDNEVSSATFQSLVPDIPGHIESPVFIATNQAQSPETSVAQVAPV  
DLDGMQQDIEQVWEELLSIPELQCLNIENDKLVETTMVPSPEAKLTEVDNYHF  
YSSIPSMKEKVGNCSPHFLNAFEDSFSSILSTEDPNQLTVNSLNSDATVNTDFG  
DEFYSAFIAEPSISNSMPSPATLSHSLSELLNGPIDVSDLSLCKAFNQNHPESTA  
EFNDSDSGISLNTSPSVASPEHSVESSSYGDTLLGLSDSEVEELDSAPGSVKQN  
GPKTPVHSSGDMVQPLSPSQGQSTHVHDAQCENTPEKELPVSPGHRKTPFTK  
DKHSSRLAHLTRDELRAKALHIPFPVEKIINLPVVDNFEMMSKEQFNEAQLA  
LIRDIRRRGKNKVAAQNCRRKRKLENIVELEQDLHLKDEKEKLLKEKGENDK  
SLHLLKKQLSTLYLEVFSMLRDEDGKPYSPSEYSLQQTRDGNVFLVPKSKKP  
DVKKK

**>*Scophthalmus maximus-Nrf2* (QLA46489.1)**

METEVMHPSQQDMDLIDILWKQDIDLGAQREVFHDYNHRQKEHELQRQRKLE  
EEKRLHLLREQEKALLAQLQLDEETGEYIPRPPSSAPLQSTVTPLEVTQNVSF  
TEENGDALESFDECLQLLAETFPVEETENTSVCLDTAAVSVASSGNMMMPER  
PPLPPAAISPGPLPPTLPPQRMSPDLEQAXMELLSLPELQQCLSMQMEDTLETT  
TYSLPNNPKVQNaNFTVYPMTNLKEGETNSLNVCPAELINTFDGSVSSMASP  
DNLSQMEVKAPQLNTNFGVESFCDMFYPTILEESSGQHGLEGNLSTTMSDV  
TNKPSFTPMDLYSLSPGEAFFDRGKQNLTAEVPSDSGSISSYTSNACSPAUSA  
YGDGSYGYSDSDMDMDQSPGSAESDYSEMFSNLNYQPDDLQTTDSASAIGQP  
HQQHVKKPKHYKTDLAEESEGHNNAPFTKDKLKRRSDVRLPRDEQRAKALKI  
PLSVDMIINLPVDDFNEVMSKHQLTEAQLALVRDIRRRGKNKVAAQNCRRKR  
KMZNIVGLEGELDSLKDEKERLLSEKSNITNLKEMKQQLNSLYLEVFSRLRD  
EKGNFSFSPDYSLQQSTEGSIFLVPRIKKTLIKREENHLSPM

**>*Ctenopharyngodon idella-Nrf2* (ART92576.1)**

MMEIELPKMHPSQQDMELIDILWRQDVLDGAGREVFDFSQRQKEVELRRQR  
EQEEERQQLHLREQEKALLAQLQLDEETGEFVPRSLPASGTLTQTNTTNGEIA  
QNGAFAAQEGDALSFDECMQLLAETFPPLDEPAESAPPCLDVSVPTTDLMMMP  
ADTPAFTQNPLLPGSLDQAWMELLSLPELQQCLNMQMQUETLNMDGFMKPSG  
EAQNPSYSQYLPMDHLSSVQTEVCPPEYINTYDGSFNNMVSPNLSQMSLVN  
PDVGAEFRPEEFNELFYPEMEAKVNSGPLTSDGGNMVSQLAETASDSPVNPM  
DLQSFSPGNLSSGKPEPIVEFPDSDSGLSLDSSPHMSSPGKSLNEDGSFGFSDD  
SEMDGSPGGTESDYTEIFPLVYLNDGAQTSLSKSPAQQEMKAKNPKTEP  
VEASGYSKPPFTKDKQKKRSEARLSRDEQRAKALQIPFTVDMIINLPVDDFNE  
MMSKHQLNEAQLALVRDIRRRGKNKVAAQNCRRKRKLENIVGLEIELDSLRE  
EKERLKKKESRSTSLREMKQQLSTLYQEVFGMLRDEHGKPFSPNEYSLQHT  
ADGTVFLVPRLLKKTLLVKN

**>Mus musculus-Nrf2 (NP\_035032.1)**

MMDLELPPPGQLSQQDMDLIDILWRQDIDLGVSREVFDQSQRQKDYELEKQK  
KLEKERQEQLQKEQEKAFFAQFQLDEETGEFLPIQPAQHQTDTSGSASYSQV  
AHIPKQDALYFEDCMQLLAETFPFVDDHESLALDIPSHAESSVFTAPHQAQSL  
NSSLEAAMTDLSSIEQDMEQVWQELFSIPELQCLNTENKQLADTTAVPSPEAT  
LTEMDSNYHFYSSISSLEKEVGNCGPHFLHGFEDSFSSILSTDDASQLTSLDSN  
PTLNTDFGDEFYSAFIAEPSDGGSMPSAAISQSLSELLDGTIEGCDLSLCKAFN  
PKHAEGTMEFNDSDSGISLNTSPSRASPEHSVESSIYGDPPPGFSDSEMEELDS  
APGSVKQNGPKAQPAHSPGDTVQPLSPAQGHSA PMRESQCEN TT KKEVPVSP  
GHQKAPFTKDKHSSRLEAHLTRDELRAKALHIPFPVEKIINLPVDDFNEMMSK  
EQFNEAQLALIRDIRRRGKNKVA AQNCRKRKLENIVELEQDLGHLKDEREKL  
LREKGENDRNHLHLKRRLSTLYLEVFSMLRDEDGKPYSPSEYSLQQTRDGNV  
FLVPKSKKPDTKKN

**>Danio rerio-Nrf2 (BAC10573.1)**

MMEIEMSKMQPSQQDMDLIDILWRQDVDLGAGREVFDQSYRQKEVELRRRR  
EQEEQELQERLQEKEKTLLAQLQLDEETGEFLPRSTPLTHTPEADGGGAGEIT  
QNGAFAEQEADPMSFDECMQLLAETFP L TEPAESAPPCLNTSAPPSTDLMMP  
ADVPAFTQNPLLPGSLDQAWMELLSLPELQQCLNMPMQETLDMNAFMKPST  
EAPTQNYSQYLPMDHLGSAQTEVCPPEFTNTYNRSFNTMVSPNMNQLSLN  
VPDVGAIEFGPEEFNELFYPEMEVKVNNPPITSDGGNMVGDPPVNPIDLQSFSP  
GDFSSGKPDPIVEFQDSDSGLSLDASPHMSSPGKSITEDGSFGFSDSDSEEMEG  
SPGSMESDYNEIFPLVYLNDGSQTPLSEKSSTEKQEMKLKNPKMEPAEASGHS  
KPPFTKDKLKKRSEARLSRDEQRAKALQIPFTVDMIINLPVDDFNEMMSKHQ  
LNEAQLALVRDIRRRGKNKVA AQNCRKRKLENIVGLEEYELDSLKEEKERLM  
KEKSERSSNLKEMKQQLSTLYQE VFGMLRDENGKAFSPNEFSLQHTADGTVF  
LVPRLKKTLVKNI

**>Mauremys reevesii-Nrf2 (AFX95917.1)**

MELEAPPAPQDMNLIDILWRQDIDLGARREVFDQSQRQKEYELEKQKKLEKE  
RQEQLQKEQEKAALLAQLQLDEETGEFIPIQPAQHIESDNTGMPTNFSKTTHISK  
PEADALSFDCCMQLLAETFSFVDDNEVFSAAFQVLVPAHIDSDPIFITSNQTQP  
PESSVLQSPVTDVDNMENIEQVWEELLSIPELQCLNIENDNLAEVTTIANPETK  
PSEIHSNFYNSLPITVNCNSDFLNTFEDSF SNILPPEDLSQLRVASLDTTSCSSN  
FSEDFSTFVDPKVNGDTAAPNIVNKSFAEVVPYEPIDISDFSRCKAFNGDLQGN  
ALECNDSDSGISLNAHSNTASPEHSVESSVFGDAAFGYSDSEMEEMESAPGSL  
HQSN AQMYSLQFHDPVPPSLGPSTQKSDLQCVNTPKREL PANPGHPKAPFTR  
DKPSHYLEAHFTRDEQRAKALHIPFSVEKIINLPVDDFNEMMSKEQFNEAQLA  
LIRDIRRRGKNKVA AQNCRKRKLENIVELEQDLGHLKDEKEKLLKEKGENDK  
SIRLMKKQLTNLYLEVFSMLHDENGKPYSPSEYSLQQTKDGSIFLVPKSKKPE  
TKF

**>Xenopus laevis-Nrf2 (NP\_001079522.1)**

MMEIEIPLPLQSQQDMDLIDILWKQDIDLGVSREVFDYNQRQKENDLEKQKK  
LEKEKQEQLQKEQEKALEYAQLQLDEETGEFIPMQQAAPTETVADTQALAGSI  
QDKPSPVHELSEFDECLKILAETFIQGPSNEDSPVAYQTLEPSAPIETNQIFFQSEP  
NSVTAGTLNSIPAQGETVHEINQAWHEELLSIPELQCLSNEIENMVEQSMYPNPE  
STTMTETQNTFSFFTPLSAMEKPQENNTSVFPTDYVDTIASSVPSVNTNATFN  
VESFCDDIFTLVDPKVTNIVPLTNNSGQLLKELLHDNVDTDLDSLCKAFNGSN  
QPEFNDSDSGVSNTSPCATSPSQSLGGSAYGEPHYGYSDSDMEDMDSTPEIA  
QENPPDNFTAPFTEDTYFSLSPFISHDTDPFEVKAHDSPAKEIPASPGYSKAPFA  
KDKSLNLQEARFTRDEQRAKVLNLPFTVEKIVNLPVDSFNEIMSKYQFNEAQL  
ALIRDIRRRGKNKVAAQNCRKRMENIVELETDLDLTKYEKEKLLAERGEYN  
NSLSQLKKNLGNLYMEVFNKLQDENGKPYSPQEYSLQQTKEGNIFLVPKTKK  
VSIKKE

**>*Gallus gallus-Nrf2* (XP\_046777086.1)**

MNLIDILWRQDIDLGARREVFDIFSQRQKEYELEKQKKLEKERQEQLQKEREK  
ALLAQLVLDEETGEFVPAQPAQRVQSENAEPPISFSQSTDTSKPEEALSFDDC  
MQLLAEAFPFIDDNEASPAAFQSLVPDQIDSDPVFISANQTQPPSSPGIVPLTDA  
ENMQNIEQVWEELLSLPELQCLNIENDNLAEVSTITSPETKPAEMHNSYDYNN  
SLPIMRKDVNCGPDFLENIEGPFSSILQPDDSSQLNVNSLNNSTLSSDFCEDFY  
TNFICAKGDGDTGTTNTISQSLADILSEPIDLSDFPLWRAFNDHSGTVPECND  
SDSGISLNANSSIASPEHSVESSTCGDKTFGCSDSEMEDMDSSPGSVPPGNASV  
YSSRFPDQVLPSVEPGTQTPSLQRMNAPKKDPPAGPGHPKAPFTKDKPSGRLE  
AHLTRDEQRAKALQIPFPVEKIINLPVDDFNEMMSKEQFSEAQLALIRDIRRRG  
KNKVAAQNCRKRLKENIVELEQDLSHLKDEREKLLKEKGENDKSLRQMKKQ  
LTTYIEVFMSLRDEDGKSYSPSEYSLQQTRDGNIFLVPKSRKAETKL

**>*Bactrocera dorsalis-CncC***

MGLPASELDVFLNSENFDQQRSVWEQNLADLRDFGDLAVNNPYAGLPLKDE  
PHNNTYIDVNLDMMFFPSFASAVAGGVAVKEETVGAGALNDTFPEPADIASIKT  
EQLDKEEEEFVVENEVATASSTSDEAAPKIKKETESGEDNGQAAASEEFDLSP  
FISQLDLFKEPSFEGKDGDDAGDIDDEWAGIPFTVDNETGEYIRLPLDEILNDV  
LQLAEFGNINNECSNDSVASTSKAAAAKTNNNNNNNDKTKTETGEDELNEN  
KNVSAIISNGKDEDLAKKTLGTITDGTTKEEHDKTEEDYIDDFDLSLSEIEVNS  
LPSPLFDLDDEAREELADFDIMLQSAGAPPSPFHHHHSHQRGAGMQGYVGGG  
ANSAFHRQAGGFHHGHGHQGRMSLSRGVSMEQRLQDIASFFNPISSMGVVGG  
VSDMPPYPHYPTHYPYSYQGAAGIPAPPQHAQYPPPPPHHHSHHAMLHANAT  
LGDICPTQPHYGHNLGSAVTSSMHLTNSSHEADAGAAASAGAAGGNVGAYK  
MEHDMMYTNNSSSDMNHTTEGFINSILNDEDLHLMDMNDSFCRMVDVNS  
TSNNSSVLGGSAGLSNGHASAGGSSATGSSTNGLAMNGAGATNSALAGGMT  
ADLLGSGAGGTSASGDRLDASSDSA VSSMGSERVPSLSDGEWGEGSDSAQD  
YHQGKYGRPYDYSYNNNNNRMNDGTRQPPVAQKKHQMFGRFLNEQPDL  
GAVPTTADNGSNIGVVPPTGTNSLLNIGPAQSIKYEYEA YPTVPGLQPGGAGG  
ALNAEGAIGPVLNKEQQA YDLKYGPAVAGAMGGYTLDFAQRPPRTPHEIV  
QHNHTYTLPQGTGSMRPQARDKKLSTSSSKSSKSVNGEEHHLTRDEKRARA

LNPIAVSDIINLPMDEFNERLSKYDLTENQLSLIRDIRRRGKNKVAAQNCRK  
KLDQILSLEDEVKEVRRRKEQLHSDHDSLNLERKRISNKFAALHRHIFQYLRD  
PEGNPCSTSEYTLQQAADGSIYLLRKSDATNGSGNISNSSSTSSSSSSSGSGSVSTL  
LSHNGMSPQQQQQQQQHAMLGTATHLQQHHHHHNAQAPQQQQQLSHMH  
TQQVQQAQQQQQQQQQQRQHSAAHAHHHQTHQKD

**>*Micromelalopha troglodyta-CncC* (QCU79915.1)**

MTRGPDSPTLSILRQSLMRSMSVEQRWQDLASLLTIPPPPDQYQHYYHHHHHQ  
HPHNISAHGAAGGYGPNHHAPLPPPAPEKHPDAYGATAPIDGAYKVESARHS  
QQHDGIYYQNPSGEMAPPPNQDGLLQSILNDEDLQLMDMAMNEGMYTMRM  
LDSAASHHAPHPNHTHMMMTAERDSASDSA VSSMGSERVPSLSDGEWCDGS  
DSAQEFHSSKFRPYDAA YPRERSAPHQPPQKKHHMFGKRCFQEQPAPAIEP  
VPPRPGVVKEYEPEQTYHHEPMHNMHNRIPLVQDIINLPMDEFNERLSKHVLS  
EAQLSLIRDIRRRGKNKVAAQNCRKRLDQITSLADEVRTVRDRKHRTQREH  
SQLLAERQVRKERFASLYRHVFQNLRDPEGRPLSSAAYSLQQAADGNVVLVP  
KMPQHHDHPMNRSSDDEMDRKAKHYDQ

**>*Plutella xylostella-CncC* (AER37577.1)**

MLLDEVMTMRSLSPDPEDMANVSRKCNNTLDMDLIEVLWKQDVDMGFSL  
EDPVQPEGPTATKVLGDEIEKELKLAEEKIVKKNEEKAEIEKVKASLLDPEIKE  
DDPWAGLSYTVDTETGEYVIQGDLPRELVSSEESRFDLLEEALGLVELGDEA  
DTKNEPPEAIEGSSSGTGSEMLHPAMRHVP HHPLAHYHNQSLMRSMSVEQR  
WQDLASLLTIPPPPPPEQYQHYYHPHHQHHAHNISSHGAAAGYGPKLHASIPP  
VPEKHPEAYGGRSAPLEGAYKVEAAQHPPQHDPLYYNASAEMTGPTNQD  
GFLQSILNDEDLQLMDMAMNEGMYTMRMLDGAGPHHAPHHTHSHMMTTE  
RDSASDSA VSSMGSERVPSLSDGEWCDGSDSAQEFHSSKFRPYDSSFGRRSN  
PHQPQKKHHMFGKRCFQEQPAPTLDPVGRPSVVKEYECPEQTYHHENMHMH  
NVEFAPRPQLAPPHVTNLHAPALDLNTAHSSHALLQSNIPSPAPPRFAYATPER  
VRHNHTYSAPLANDQRPAAVRDKLVRRLTDGMSDGGSSATSSGQHLSRDE  
KRAKALGIPLEVQDIINLPMDEFNERLSKHDLSAQQLSLIRDIRRRGKNKVAA  
QNCRKRLDQITSLADEVRTVRDRKQRTQRDHSNLLAERQVRKERFAALYR  
HVFQNLRDPEGRPLSSQQYSLQQAADGNVVLVPKMPQHHDHPMNRSTSDDD  
MDRKAKSYDQ

**>*Drosophila melanogaster-CncC* (NP\_732833.1)**

MISNKKS YAMKMLQLALALSLLHYNPDYLLHRWDSQLELGTHGDGWELEM  
LRTVHRLDMDHNPYGNRKGLSPRIEDLLNFDDPSLGGMANGIGGCKLPFRN  
GSTFVMNLHNTTGNSSVQTAALQDVQSTSAAATGGTMVVGTGGAPTSGGQT  
SGSALGEIHIDTASLDPGNANHSP LHPTSELDTFLT PHALQDQRSIWEQNLADL  
YDYNDSLQTSPLYANLPLKDGQPQPSNSSHLDSL AALLHGFTGGSGAPLSTA  
ALNDSTPHPRNLG SVTNNSAGRSDDGEESLYLGRLFGEDEDEDYEGELIGGV  
ANACEVEGLTTDEPFGSNCFANEVEIGDDEESEAIEVLYKQDVLDGFSLDQE  
AIINASYASGNSAATNVKSKPEDETKSSDPSISESSGFKD TDVNAENEASAASV  
DDIEKLKALEELQQDKDKNNENQLEDITNEWNGIPFTIDNETGEYIRLPLDELL

NDVLKLSEFPLQDDLSNDPVASTSQAAAAFNENQAQRIVSETGEDLLSGEGIS  
SKQNRNEAKNKDNDPEKADGDSFSVSDFEELQNSVGSPLFDLDEDAKKELDE  
MLQSAVPSYHHPPHGHGPHAHPHSHHHASMHHAHAHHAHAHAHAHQRA  
VQQANYGGGVGVGVGVGVGVGVSGTGSFAQRQPAAGGFHHGHHQGRMPRL  
NRSVSMERLQDFATYFSPISPMVGGVSDMSPYPHHYPGYSYQASPSNGAPGT  
PGQHGGQYGGSGANATLQPPPPPPPHHAAMLHHPNAALGDICPTGQPHYGHNL  
GSAVTSSMHLTNSSHEADGAAAAAAAYKVEHDLMYYGNTSSDINQTDGFIN  
SIFTDEDLHLMMDNESFCRMVDNSTSNSSSVLGLPSSGHVSNGSGSSAQLGA  
GNPHGNQANGASGGVGSMSGSAVGAGATGMTADLLASGGAGAQQGADRL  
DASSDSAVSSMGSERVPSLSDGEWGEGSDSAQDYHQGKYGGPYDFSNNNS  
RLSTATRQPPVAQKKHQLYGKRDPHKQTPSALPPTAPPAAATAVQSQSIKYE  
YDAGYASSGMASGGISEPGAMGPALSKDYHHHQPYGMGASGSASFSGDYTVR  
PSPRTSQDLVQLNHTYSLPQGGSGSLPRPQARDKKPLVATKTASKGASAGNSSS  
VGGNSSNLEEEHLTRDEKRARSLNIPISVPDIINLPMDEFNERLSKYDLSENQL  
SLIRDIRRRGKNKVAAQNCRKRKLDQILTLEDEVNAVVKRKTQLNQDRDHLE  
SERKRISNKFAMLHRHVFQYLRDPEGNPCSPADYSLQQAADGSVYLLPREKS  
EGNNTATAASNAVSSASGGS LN GHVPTQAPMHS HQSHGMQAQHVVGGMSQ  
QQQQQSRLPPLHQQQHHLQSQQQQPGGQQQQQHRKE

>*Ceratitis capitata-CncC* (XP\_012159076.1)

MISNKKCYAMKMLQIALALSLLHVDPEQRLRNWDSQLELRDGDGWELEML  
RAVPMVEYPYANRKTMMPLIEDLIRYDRQHDPTPPQYNVTAYMLNVQNDG  
GTNQTATLPEIQATSSGTTNPASNVAVAGATALEQAANAAAAAAASTNAS  
NMGLPASELDVFLNSENFDQQRSVWEQNLADLRDFGDLAINNPYAGLPLKD  
EPYNNTYIDVNLDMFLPSFASAAAAAAAANDVKQENVAAAGALNDTFPEPA  
DVASIKTEQIDKEEAEEQEFVLNNEASSSGVSSAETVFTTTPTSQAIIKKEPIE  
SSGDDEAQTEMEEVDLSPFFSQLDIMKEESEIIDVLWKQDVLDGYSLTPAHLI  
NTTGNGSAGAVSTDDEIEKLKALEALKLDKPNFDGKDGGDDAGVPDIDDE  
WAGIPFTVDNETGEYIRLPLDEILNDVLQLAEFGNLNNEPNNDDSYASTSKAA  
AVKNDDDDKRITKSETSEDEGINDDNITSARLVNGKEETEKDSNKKTLATSTTD  
KDTKLERESINENDYIDDFDLSLSEIEVNSLPSPLFDLDDEAREELADFDMLLQ  
SAAAPPPTFHHPHSHQRGAGMQGYVGGGANS AFHRQASGFHHGHHQGR  
MSLSRGVSMEQRLQDIASFFNPISGMGVGGVSDMPPYPHYPTHYPYSYQSAA  
GIPAPPQHAQYPPPPPPHHPHSHHAMLHANATLGDICTPTQPHYGHNLGS  
AVTSSMHLTNASHDADGGASASAGAAGGNVGAYKMEHDMMYITNASSDM  
NHTTEGFINSILNDEDLQLMDMND SFCRMVDVNNSTSNSSSVLGGGLAAGH  
ASTGGGSATGSIANGLTMSGAGAANSALTGGMTTDLSSGAGATSAGGDRL  
DASSDSAVSSMGSERVPSLSDGEWGEGSDSAQDYHQGKYGRPYDYSNNNS  
NNRMNDGTRQPPVAQKKHQMFGKRFLNEQPGLGAVTARPDNNSNAGGGVN  
VLPPTGANNLLNIGPAQSIKYEYEPYPTVPGLQQGGSGGV LNADGAMGPALS  
SKEQQAYDLKYGP AVAG AIGGYSLDFAQRPPRTPHEVVQHNHTYTL PQGTGS  
MPRPQARDKKLSISSSKSSKSMNGEEHLTRDEKRARALNIPISVSDIINLPM  
DEFNERLSKYDLTENQLSLIRDIRRRGKNKVAAQNCRKRKLDQILSLEDEVKAV  
RSRKEQLYADRDSLTLERKRISNKFALHRHIFQYLRDPEGNPCSTSEYSLQQ

AADGSIYLLRKSDATNTGGNASNSSSTSSSSSSGSSSSAGGGGGGGGAAAAAEG  
VNGHTMRHNGVSPQQHAMLGAATHLQQQQQQQTLHHQHHAQTQQQQLS  
HMHPQQAQQQQQQQQQQQQQRQHSAAHAHHHQTQQKD

>*Aedes aegypti-CncC* (XP\_021693907.1)

MAALEYEDLPRMQSLTPEPDDTGSLKDGMGAPEFEQQQQQATTQVVVIGGD  
SSCNLADDCNDKPNSCDHDEVGYHSPLYNYSKYNLKEMDLIEVLWKQDVD  
LGFTLTPLTVPSGASGGATSGMATKGATSAEDSSDDLEKLKVLLEIKHDDDK  
KKDNADKQAEENPWAGMSYTVDIETGEYVLNATDGSEATLPPPLADLFLEE  
GLNLPELINDTVIEETEEPAKKKTAEQEEEEEESEVKRIERELESSADELCQGA  
AASVSATSGSTSASPCDLNICSEQQATATSSVVDREQQDSPNHPEAAGAASPD  
DLEDILCDMMIQTSSSHFQHPRQPMQNYGHGMHGSLRQGGYHHHHHHHHH  
QSRVPLSRAVSMEQRFQDLANLLSFPPGMGVGMGVGEMPPAHPHPHYPPHY  
SYQANGAIPQHGGYHSHAVLQNASLADIGPTQPYYAPNLGSAVATSMHLTNS  
TSETDAGATGYKMDHEMMYYSNSTSEMNHDTGFLNSILDDDLQLMDIAVNE  
GMYTMRMLDHNATSSNSSVLGGSLGGSAAVAAAAAAGLNGPAHLGGLMS  
SASAAVSSGAMQTSLNGSTGTHGATGGTTSGBDRLDASSDSAVSSMGSERVPS  
LSDGEWGDGGSDSAQEYHNKYGGPFDYSYSGSNRLGDGTRQPPVAQKKHH  
MFAKRYFQEQNTSIPSLPSATNPSATGPTVDPQSQLNASIPIKYEFDYMNPA  
SHLEGAVGPVTKQEDQTSAHNNPLSSVDMKYYPYSLDFSRQNPASAPAARSHH  
HDVIHHNHTYTLPHNSGANPKPQTRDKRIRKAEEEHLTRDEKRARALQIPIV  
QDIINLPMDEFNERLSKYDLSETQLSLIRDIRRRGKNKVAQAQNCRKRLDQIV  
TLADEVKDMKMRKERLLRDREIIQTERKRIRDKFSALYRHVFQNLRDSEGNP  
YSQEHWSLQQSADGTVVLVPRSVDRQQDLTGSNHQQQQQQLGMAGGSGLP  
HSHHQQQHLLHLQQHQHPHSQQQHGGSSSGSNSTNSSGASGGSQHRPKE

>*Tribolium castaneum-CncC* (NP\_001164113.1)

MDMDLIEVLWKQDVLDGFSLDVANGKADKPDADLQNGSPSSSISMENDEIE  
KLKTLKAINDDNIKEPENELADPWAGFNYTIDTETGEYVVKAEELSESITGA  
DCGPSCDLPLGDLPLPEFLLEALRLVELDDTPQEAINVKELENLAEGTNET  
EPSTSAPKASETPSSSKDSDDDLILTDMIQTSQFHHPHHRAHQGRMPFVRTVS  
MEQRWQDLANLLSLPSPGDTSGMPHPFHHHPLHNYSHPHAHGMAYSPEAT  
RGVLLHNATLTPPMGDINATVPYNNIGGTNLGNAVATSMNLNNSSEPMGEPN  
SAPHYKLEPSHDMMYQNSTTELNQTDGFLSSFLNDEDLQLMDMAMNEGM  
YTMRMLDSNNAVSNLSMNGATGTTTSLSRDVERMDTSSDSAVSSMGSERV  
PSLSDGEWCDGGSDSGHTAGDHYVTDYHQTKYRKYDYSYTSRQHASALAA  
ASDATRMPPVAQKKHQMFGRYQLQEQGATSAVSHQPPVKYERYDPTAAPY  
NSSQPEGAVGPKPSEMKYSCSMEFGRHSHLVRNSLDHIQHNHTYHLPTSTG  
AMQRPVSRDKTKSKKGDEEHLTRDEKRARALNVPITVDDIINLPMDEFNERL  
SKYDLSEPQLSLIRDIRRRGKNKVAQAQNCRKRLDQILSLADEVKDMRDRKM  
RLMNEHEYVTGECQRMKDKYQQLYRHVFQNLRDPDGNQYSPYQYSLQTS  
DGSILVVPRSNSTMTNPEHKEPPPQGHKD

>*Nasonia vitripennis-CncC* (XP\_032455415.1)

MLERITAKNMLNLKKIYSDELLQLALLLSLLRVPDSYLGLDMQTIGVGSLDL  
NNGSGWHTDSHTIVHRPAFVHPKNLDSMLLNYERDLIEDLNSLGRYNRINTA  
PNDIHAYLLNVDDRAGPSTPVITDTPSTRNASSPDAPESSQTTEDTLGAAELT  
QEDMDLIEVLWKQDVDLGFTLVDQTPKTDPATSSKKESEDEIEKLKTLEAINA  
SDDKKDPKIKEEPAKEEDPWAGLPYTVDLETGEYILDDSAQQAAPSAEAAAA  
PREQPKEDEEEQLLGEAGLGLGSVDELVGLGENSLGLNGTLGLENDFTSDLL  
GDDCLLDGCSAVDGLNNDLSGLPDGFNLEEALQLVGLDEVELEKKPEVKK  
KREEDSDGARSESRTSTSENEDCCCCNGCCPEGAEADSMIHTPQYHHPHPH  
HHRSFQSRVPFVRSVGMQDQRPDIAPFFSVSGAGNGAAAAASTDHFAHPV  
GHHHHHHHHHHHPSYTSHGPAATHGHGHEAQRNVLLHNATLAPPVGD LN  
STGTYHNAGGPSNLGSAVATSMNLNNSSEPMGADSSGAYKPEPSDMIYYQN  
ASADTMNQTDIFNALLDDPLGWNE DLSFNVS DGLYGGASTATGAQATLPGV  
QAANASSGAGGGVVP GAVTDERMDASSDSAVSSMGSERVPSISDGEWMETG  
SNSHTQADSHYSMDYNGKYRMPYDACGYTLPSGRGGQRSSCQEARGLAP  
VAQKKHHMF GKRCFQE QGPMSGAAGGAGSPLAGQTHQAATTPGKYDY EAA  
QSV AAGPPGQAYAGPIEGAAGPQPEIKYSCSLDFTRHQTARSSLEHVQHNHT  
YHLPPESSGALQRPVSRDKKGRKSDGEEHLTRDEKRARALNVPIAVNDIINLP  
MDEFNERLSKYDLSEPQLSLIRDIRRRGKNKVAAQNCRKRLDQINSLSDEVK  
EMRNRKMRLLSDRNYMLQEVARVKEKFGQLYRHIFHSLRDPEGRPYNSLEY  
SLQQSATDGSILLVPRSGNNSNGHYTRSTMDPSKPNKADSHHQPRQDHE

>*Apis mellifera-CncC* (XP\_026301945.1)

MDLIEVLWKQDVDLGFTLVEPTTTATKKLSTVEKGSDDDEIEKLKALEANGSN  
EEKDTKEYDEAQDDPWAGLPYTIDLETGEYILNSGNQEGDGNAIEEDDRLL  
REASLDLDNHPLAGLTDDSLGLTDTLELENDLPSDLLGGSLLASANVESLLNN  
DSL DLPDGFNLEEALQLVGLDEAQSEETKPEVKKKEKDSIEESTSEAKDDESPI  
ISSSSSVEVAKSSRCEDPETGDMIHTPQFHHPHPHHRSFQGRMPFMRAMSME  
QRWQDLASLLSLPGAPEHFPHTHPGYPGHGISHSHYEAQRNVLLHNATLAPP  
VGDLNSTSPYHNVGGSSNLGSAVATSMNLNNSSEPMGAESGAAYKSEPADM  
MYHTPTSDSINQTTDGLSSLLNDEDLHLMDMAMNDGMYTMRMLDNGNN  
NASGPTGAAALSGVQTAGGTTSSATGVTTLPGVTDERMDASSDSAVSSMGSE  
RVPSLS DGEWMETGSNSSHTQADSHYTMDYASKYRMSYDCSYSVSGRNAGS  
PRCQTERTMPPVAQKKHQMF AKRYFQE QGTGSPLGATAHPTTPMKYEYDSH  
TVGAGAPGNAYS GPIEGATGPQPEIKYSCSVDFSRHQSGRSAIEHVHHNHTYH  
LPAESSGSLQRPVSRDKKVRKNDGEEHLTRDEKRARALNVPIVNDIINLPM D  
EFNERLSKYDLSEAQLSLIRDIRRRGKNKVAAQNCRKRLDQIISLADEVKEM  
RDRKMRLVREREFMLIERQRVKDKFSQLYRHVFQSLRDPDGNQYHPYEYSL  
QQSADGNVLLVPRNQTNPHHPRSTTMEPKTKPDPEHKE

>*Bactrocera tryoni-CncC* (XP\_039957973.1)

MCWFEPILKGFVKRSRNLINSTKSKYYTYTNRGHTYVLKRKPSFEGKDGND A  
GDIDDEWAGIPFTVDNETGEYIRLPLDEILNDVLQLAEFGNINSECSNDSVAST  
SKAAAAKTNNNNNNINNDKTKTETGEDELNENKNVSAIISNGKDEDLAEKTLG  
TITDGTTKQE QDNTEEDYIDDFDLSLSEIEVNSLPSPLFDLDDEAREELADFDI

MLQSAGAPPSPFHHHSHQRGAGMQGYVGGGANSAFHRQASGFHHGHHQG  
RMSLSRGVSMEQRLQDIASFFNPISSMGVVGGVSDMPPYPHYPTHYPSYQGA  
AGIPAPPQHAQYPPPPPHSHHHSHHAMLHANATLGDICPTQPHYGHNLGSA  
VTSSMHLTNSSHEADAGAAASAGAAGGNVGAYKMEHDMMYTNSSSDMN  
HTTEGFINSILNDEDLHLMMDMNSFCRMVDVNNSTSNSSVLGGSAGLSNGH  
ASGGGGSATGSSTNGLAMNGAGATNSALAGGMTADLLGSGAGGTSAGGDR  
LDASSDSAVSSMGSERVPSLSDGEWGEGSDSAQDYHQGKYGRPYDYSYNNN  
NNRMNDGTRQPPVAQKKHQMFGKRFLNEQPDLGAAPTTADNGSNIGVVPPT  
GTNSQLNIGPAQSIKYEYEA YPTV PGLQPGGAGGALNAEGAIGPVLSNKEQQ  
AYDLKYGPAVAGAMGGYTLDFAQRPPRTPHEIVQHNHTYTLPQGTGSMPRP  
QARDKKLSTSSSKSSKSINGEEDHLTRDEKRARAQNIPIAVSDIINLPMDEFNE  
RLSKYDLTENQLSLIRDIRRRGKNKVAAQNCRRKRLDQILSLEDEVKEVRRR  
KEQLHSDRDSLALERKRISNKFAALHRHIFQYLRDPEGNPCSTSEYTLQQAAD  
GSIYLLRKSDATNGSGNISNSSSTSSSSSGSGSVSTLLSHNGMSPQQQQQQQHA  
MLGTATHLQQHHHHHHAQAPQQQQQLSHIHTQQVQQGQQQQQQQQQQRQH  
SAHAHAHHHQTHQKD
