# Supplementary material for: Molecular Cloning and Expression Profiling of CncC in Bactrocera dorsalis Hendel
Source: MDPI journal article supplement (doi:10.3390/insects13090785), 2022-08-30
Supplement: s1 [file s1]

**Table S2 Sequences of diptera CncC for the phylogenetic analysis.**

**>*Bactrocera dorsalis***

MGLPASELDVFLNSENFDQQRSVWEQNLADLRDFGDLAVNNPYAGLPLKDEP  
HNNTYIDVNLDMFFPSFASAVAGGVAVKEETVGAGALNDTFPEPADIASIKTEQ  
LDKEEEFVVENEVATASSTSDEAAPKIKKETESGEDNGQAAASEEFDLSPFIS  
QLDLFKEPSFEGKDGDDAGDIDDEWAGIPFTVDNETGEYIRLPLDEILNDVLQ  
LAEFGNINNECSNDSVASTSKAAAAKTNNNNNNNDKTKTETGEDELNENKN  
VSAIISNGKDEDLAKKTLGTITDGTTEEHDKTEEDYIDDFDLSSLSEIEVNSLPS  
PLFDLDDEAREELADFDIMLQSAGAPSPFHHHSHQRGAGMQGYVGGGAN  
SAFHRQAGGFHHGHHQGRMSLSRGVSMEQRLQDIASFFNPISSMGVVGGVSD  
MPPYPHYPTHYPSYQGAAGIPAPPQHAQYPPPPPHHHSHHAMLHANATLGDI  
CPTQPHYGHNLGSAVTSSMHLTNSSHEADAGAAASAGAAGGNVGGAYKMEH  
DMMYYTNSSSDMNHTTEGFINSILNDEDLHLMDMNDSTFCRMVDVNNSTSN  
SSVLGGSAGLSNGHASAGGSSATGSSTNGLAMNGAGATNSALAGGMTADLL  
GSGAGGTSASGDRLDASSDSAVSSMGSERVPSLSDGEWGEGSDSAQDYHQG  
KYGRPYDYSYNNNNNNRMNDGTRQPPVAQKKHQMFGRFLNEQPDLGAVPT  
TADNGSNIGVVPPTGTNSLLNIGPAQSIKYEYAYPTVPGLQPGGAGGALNAE  
GAIGPVLSNKEQQAYDLKYGPAVAGAMGGYTLDFAQRPPRTPHEIVQHNHTY  
TLPQGTGSMRPQARDKKLSTSSSKSSKSVNGEEHLLTRDEKRARALNIPIAVS  
DIINLPMDEFNERLSKYDLTENQLSLIRDIRRGKNKVAAQNCRKRLDQILSL  
EDEVKEVRRRKEQLHSDHDSLNLERKRISNKFAALHRHIFQYLRDPEGNPCST  
SEYTLQQAADGSIYLLRKSDATNGSGNISNSSSTSSSSSGSGSVSTLLSHNGMS  
PQQQQQQQQHAMLGTATHLQQHHHHHNAQAPQQQQQLSHMHTQQVQQA  
QQQQQQQQQRQHSAAHAHHHQTHQKD

**>*Drosophila melanogaster* (NP\_732833.1)**

MISNKSYAMKMLQLALALSLLHYNPDYLLHRWDSQLELGTHGDGWELEM  
LRTVHRLDMDHNPYGNRKGLSPRIEDLLNFDDPSLGGMANGIGGCKLPPRFN  
GSTFVMNLHNTTGNSSVQTAALQDVQSTSAAATGGTMVVGTGGAPTSGGQT  
SGSALGEIHIDTASLDPGNANHSPHPTSELDTFLTPHALQDQRSIWEQNLADL  
YDYNDLSLQTSPYANLPLKDGQPQPSNSSHLDSLAAALLHGFTGGSGAPLSTA  
ALNDSTPHPRNLGSVTNNSAGRSDDGEESLYLGRLFGEDEDEDYEGELIGGVA  
NACEVEGLTTDEPFGSNCFANEVEIGDDEESEIAEVLYKQDVLDGFSLDQEAI  
INASYASGNSAATNVKSKPEDETKSSDPSISESSGFKD TDVNAENEASAASVD  
DIEKLKALEELQQDKDKNNENQLEDITNEWNGIPFTIDNETGEYIRLPLDELLN  
DVLKLSEFPLQDDLSNDPVASTSQAAAAFNENQAQRIVSETGEDLLSGEGISSK  
QNRNEAKNKDNDPEKADGDSFSVSDFEELQNSVGSPLFDLDEDAKKELDEM  
LQSAVPSYHHPHPHHGHHPAHPHSHHHASMHHAHAHHAAAAAAAHQRAVQ  
QANYGGGVGVGVGVGVGVGS GTGSAFQRQPAAGGFHHGHHQGRMPRLNRS  
VSMERLQDFATYFSPISMVGGVSDMSPYPHYPGYSYQASPSNGAPGTPGQ  
HGQYGSANATLQPPPPPPPHHAAMLHHPNAALGDICPTGQPHYGHNLGSA  
VTSSMHLTNSSHEADGAAAAAAAYKVEHDLMYYGNTSSDINQTDGFINSIFT  
DEDLHLMDMNESFCRMVDNSTSNSSSVLGLPSSGHVSNNGSGSSAQLGAGNP

HGNQANGASGGVGSMSGSAVGAGATGMTADLLASGGAGAQQGADRLDASS  
DSAVSSMGSERVPSLSDGEWGEGSDSAQDYHQGKYGGPYDFSYNNSRLSTA  
TRQPPVAQKKHQLYGKRDPHKQTPSALPPTAPPAAATAVQSQSIKYEYDAGYA  
SSGMASGGISEPGAMGPALSKDYHHHQPYGMGASGSASFSGDYTVRPSPTSQ  
DLVQLNHTYSLPQGSGLPRPQARDKKPLVATKTASKGASAGNSSSVGGNSSN  
LEEEHLTRDEKRARSLNIPISVPDIINLPMDEFNERLSKYDLSENQLSLIRDIRRR  
GKNKVAAQNCRKRLDQILTLEDEVNAVVKRKTQLNQDRDHLESERKRISNK  
FAMLHRHVFQYLRDPEGNPCSPADYSLQQAADGSVYLLPREKSEGNNTATAA  
SNAVSSASGGS LN GHVPTQAPMHS HQSHGMQAQHVVGGMSQQQQQQSRLP  
PHLQQQHHLQSQQQQPGGQQQQQHRKE

**>*Bactrocera latifrons* (XP\_018803055.1)**

MISNKKSYAMKMLQLALALSLLHVDPDNFLQQRLRNWDSQLELRDGDGWE  
LEMLRAVPMVEYPYANRKTMMPLIEDLIRYDRQH DATPPQYNVTAYMLNVQ  
NDGGTNQTATLPELQATTSTTTSTASSVNVAGAAALEQAANAAAAAAASTN  
ASNMG LPA SELDVFLNSEN FQDQRSVWEQNLADLRDFGDLAVNNPYAGLPL  
KDEPHNNTYIDVNLDMMFFPSFASAVAGGVAVKEETVGAGALNDTFPEPADIASI  
KTEQLDKKEEQEFV VENE VATSSSASDETAPKIKKETENGEDNMQATASEAFDL  
SPFISQLDLFKEPSFEGKDNDDAGDIDDEWVGIPFTVDNETGEYIRLPLDEILN  
DVLQLAEFGNINSECSNDSVASTSKAAA AKTNNNNNDKTKTETSEDELNENKD  
VSAIISNGKDEDLAKKTLDTTTDGTTKQE QDSTEKDYIEDFDLSLSEIEVYSLP  
SPLFDLDDEAREELADFDKMLQSAGAAPS PFHHHSHQRSAGMQGYVGGGA  
NSAFHRQAGGFHHGHHQGRMSLSRGVSMEQRLQDIASFFNPISSMGVVGGVS  
DMPPYPHYPTHYPYSYQGAAGIPAPPQHAQYPPPPPPHSHHHSHHAMLHANAT  
LGDICPTQPHYGHNLGSAVTSSMHLTNSSHEADAGAAASAGAAGGNVGAYK  
MEHDMMYTNNSSSDMNHTTDGFIN SILNDEDLHLMMDMND SFCRMVDVNS  
TSNNSSVLGGSAGLSNGHASAGGGGSATGSSTNGLAMNGAGATNSALAGGM  
TADLLGSGAGGTSAGGDRLDASSDSAVSSMGSERVPSLSDGEWGEGSDSAQD  
YHQGKYGRPYDYSYNNNNNNNRMNDGTRQPPVAQKKHQMFGKRFLNEQPDL  
GATPTTADNGSNIGVVPPTGTNSLLNIGPAQSIKYEYEAYPTVPGLQPGGAGGA  
LNAEGAIGPVLSNKEQQAYDLKYGPAVAGAMGGYTLDFAQRPPRTPHEVVQH  
NHTYTLPQGTGSVPRPQARDKKLSTSSSKSSKSVNGEEHLTRDEKRARALNI  
PIAVSDIINLPMDEFNERLSKYDLTENQLSLIRDIRRRGKNKVAAQNCRKRLD  
QILSLEDEVKEVRRRKEQLHSDRDSLALERKRISNKFAALHRHIFQYLRDPEG  
NPCSTSEYTLQQAADGSIYLLRKSDATNGSGNISNSSNTSSSSSGGGSVSTLLS  
HNGMSPQQQQQQQHAMLGAATHLQQHHHHQHAQAPQQQQQLSHMHTQQV  
QQAQQQQQQQQQQRQHS AHAHAHHHQTHQKD

**>*Bactrocera oleae* (XP\_036217502.1)**

MISNKKSYAMKMLQLALALSLLHVDPDNFLQQRLRNWDSQLELRDGDGWE  
LEMLRAVPMVEYPYANRKTMMPLIEDLIRYDRQH DATPPQYNVTAYMLNVQ  
NDGGTNQTATLPELQATTSTTSAASSVNVAGAAALEQAANAAAAAAASTN  
ASNMG LPA SELDVFLNSEN FQDQRSVWEQNLADLRDFGDLAVNNPYAGLPL  
KDEPYNNTYIDVNLDMMFFPSFASAAAAGVAVKEETVGAGALNDTFPEPADIAS

IKTEQLDKEEQELALENEVATSSSSSDEAAPKIKKEKESGEHNTQAALSEEVDL  
SPFISQLDLIKEPSFEGKDVGGDDAGDIDDEWAGIPFTVDNETGEYIRLPLDEILN  
DVLQLAEFGNINSECSNDSVASTSKAAAAKTNNNNNNNDKTKSETEEDEIND  
NSSNNNNNASAIISNGKDEDLTCKTLGTTTDTVTTKHKEDNTEEDYIDDFDL  
SEIEVNSLPSPLFDLDDEAREELADFDIMLQSAGAPPSPFHHHHPHQRGAGMQ  
GYVGGGANS AFHRQATGFHHGHHQGRMSLSRGVSMEQRLQDIASFFNPIS  
SMGVVGGVSDMPPYPHYPTHYPYSYQGAAGIPAPPQHAQYPPPPPPH  
PHHHSHHMLHANATLGDICPTQPHYGHNLGSAVTSSMHLTNSSHEADG  
GAAAAAGAGGNVGAYKMEHDMMYTNSSSDMNHTTEGFINSILNDEDLH  
LMDMNDSFCRMVDVNNSTSNSSVLGGGAGLSNGHASASGGGATGSSANGL  
AMNGAGATNSALAGGMTADLLGSGAGGTSAGGDRLDASSDSAVSSMG  
SERVPSLSDGEWGE GSDSAQDYHQGKYGRPYDYSYNNNNNRMNDGTR  
QPPVAQKKHQMFGKRFLNEQPGLGATGTTADNGSNVGVVPPTGTNSLLNIG  
PAQSIKYEYEAYPTVPGLQPGGAGGT LNAEGAMGPVLSNKEQQAYDLKY  
GPAVAGAIGGYSLDFAQRPPRTPHEVVQHNHTYTLPQGTGSMRPQARDK  
KLSISSSKSSKSLNGEEHLTRDEKRARAMNVPIPVSDIINLPMDEFNERL  
SKYDLTENQLSLIRDIRRRGKNKVAQNCRRKRLDQILSLEDEVKEVRRR  
KEQLFSDRDSLTLERKRISNKFAALHRHIFQYLRDPEGNPCSTSEYTLQQA  
ADGSIYLLRKSDATNGSGNISNSSSTSSSSSSSSVSTLLSHNGMSPQQQ  
QQQQQQPQQHSM LGAAATHLQQQQQSLHHHHHTQAQQQQQQLSHMHTQ  
QVQQAQQQQQQQRQHS AHAQAHHHQTHQKD

>*Zeugodacus cucurbitae* (XP\_011186373.1)

MISNKSYAMKMLQLALALSLLHVDPDNFLQQRLRNWDSQLELRDGDGWE  
LEMLRAVPMVEYPYANRKTMMPLIEDLIRYDRQH DATPPQYNVTAYMLNVQ  
NDGGTNQTATLPELQATTSSSTSSAGGSVNVAGAAALEQAANAAAAAAAST  
NASNMGLPASELDVFLNSENFDQQRSVWEQNLADLRDFGDLAVNNPYAGLP  
LKDEPNNTYIDVNLDMFFPSFASAAAAGAVVKEESVGAGALNDTFPEPADIA  
SIKTEQLDKEETEFALDNEVATSSSASSDEAAPKIKKEPESADDNAQAASTE  
EVDLSPFISQMDLLKEPSFEGKDVGGDDAGDDEWAGIPFTVDNETGEYIRL  
PLDEILNDVLQLAEFGNINSECSNDSVASTSKAAAAKTNNNNNNNDKTKSET  
GEDEINDNNNNNNSAIIDNGKEEDLLKNTFTGTTTDTNNTKHEQQDITEDD  
YIDDFDLSEIEVNSLPSPLFDLDDEAREELADFDIMLQSAAAPPPPFHHH  
HPHQRGAGMQGYVGSGANS AFHRQASGFHHGHHQGRMSLSRGVSMEQRLQ  
DIASFFNPISSMGVVGGVSDMPPYPHYPTHYPYSYQSAAGIPAPPQHAQY  
PPPPPPHPPHHSHHMLHANATLGDICPTQPHYGHNLGSAVTSSMHLTNSSH  
DTDGAAAAAGAGSNVGGYKMEHDMMYTNSSSDMNHTTEGFINSILNDEDLH  
LMDMNDSFCRMVDVNNSTSNSSVLGGSGGLTNHGAGVGGGSATGSTTNH  
GAMSGAGATNSALAGGMTADLLGSGAAGASAGGDRLDASSDSAVSSMG  
SERVPSLSDGEWGE GSDSAQDYHQGKYGRPYDYSYNNNNNRMNDGTRQ  
PPVAQKKHQMFGKRFLNEQPGLGATGTNADNGSNVGVVPAGTNSLLSIGP  
AQSIKYEYEAYPTVPGLQQGGAGSALNAEGAMGPVLSNKEQQAYDLKYG  
PAVAGAMGGYSLDFAQRPPRTPHEVVQHNHTYTLPQGTGSMRPQARDK  
KLSISSSKSSKSMSEEH LTRDEKRAMNIPIAVSDIINLPMDEFNERLSKY  
DLTENQLSLIRDIRRRGKNKVAQNCRRKRLDQILSLEDEVKEVRRRKDQ  
LYSDRDSLTLERKRISNKFAALHRHIFQYL

RDPEGNPCTTSEYTLQQAADGSIYLLRKSDAASGSGNISNSSSTSSSSSSSSSSNV  
STLLSHNGLSPQQQQQQQQHSM LGAATHLQQQQQALHHHHQQAQAQAQQ  
QQLSHMHPQQVAQQQQQQQQQQQQQRQHS AHAHAHHHQT HQKD

>*Bactrocera tryoni* (XP\_039957973.1)

MCWFEPILKGFVKRSRNLINSTKSKYYTYTNRGHTYVLKRKPSFEGKDGND  
GDIDDEWAGIPFTVDNETGEYIRLPLDEILNDVLQLAEFGNINSECSNDSVAST  
KAAA AAKTNNNNNNINNDKTKTETGEDELNENKNVSAIISNGKDEDLAEKTLGT  
ITDGTTKQE QDNTEEDYIDDFDL SLSEIEVNSLPSPLFDLDDEAREELADFDIM  
LQSAGAPPSPFHHHHSHQRGAGMQGYVGGGANS AFHRQASGFHHGHHQGR  
MSLSRGVSMEQRLQDIASFFNPISSMGVVGGVSDMPPYPHYPTHYPYSYQGAA  
GIPAPPQHAQYPPPPPPSHHHSHHAMLHANATLGDICPTQPHYGHNLGSAVT  
SSMHLTNSSHEADAGAAASAGAAGGNVGAYKMEHDMMYTNSSSDMNHT  
TEGFINSILNDEDLHLMMDNDSFCRMVDVNNSTSNSSVLGGGAGLSNGHAS  
GGGGSATGSSTNGLAMNGAGATNSALAGGMTADLLGSGAGGTSAGGDRLD  
ASSDSAVSSMGSERVPSLSDGEWGE GSDSAQDYHQGKYGRPYDYSYNNNNN  
RMNDGTRQPPVAQKKHQMF GKRFLEQPD LGAAPTTADNGSNIGVVPPTGT  
NSQLNIGPAQSIKYEYEAYPTVPGLQPGGAGGALNAEGAIGPVLSNKEQQAYD  
LKYGPAVAGAMGGYTLDFAQRPPRTPHEIVQHNHTY TLPQGTGSMRPQARD  
KKLSTSSSKSSKSINGEEDHLTRDEKRARAQNIPIAVSDIINLPMDEFNERLSKY  
DLTENQLSLIRDIRRRGKNKVAAQNCRRKRLDQILSLEDEVKEVRRRKEQLHS  
DRDSLALERKRISNKFAALHRHIFQYLRDPEGNPCSTSEYTLQQAADGSIYLLR  
KSDATNGSGNISNSSSTSSSSSGSGSVSTLLSHNGMSPQQQQQQQHAMLGTAT  
HLQQHHHHHHHAQAPQQQQQLSHIHTQQVQQGQQQQQQQQQRQHS AHAHA  
HHHQT HQKD

>*Ceratitis capitata* (XP\_012159075.1)

MISNKKCYAMKMLQIALALSLLHVDPEQRLRNWDSQLELRDGDGWELEMLR  
AVPMVEYPYANRKTMMPLIEDLIRYDRQHDPTPPQYNVTAYMLNVQNDGGT  
NQATATLPEIQATSSGTTNPASNVA VAGATALEQAANAAAAA AASTNASNMGL  
PA SELDVFLNSEN FQDQRSVWEQNLADLRDFGDLAINNPYAGLPLKDEPYNN  
TYIDVNLDMFLPSFASAAAAA AANDVKQENVAAGALNDTFPEPADVASIK  
TEQIDKEEAEEQEFVLNNEASSSGVSSAETVFTTTPTSQA AIIKKEPIESSGDDE  
AQTEMEEVLDLSPFFSQLDIMKEESEIIDVLWKQDV DLGYSLTPAHLINTTGNN  
GSAGAVSTDDEIEKLKALEALKLDKPNFDGKDG GDDAGVPDIDDEWAGIPFT  
VDNETGEYIRLPLDEILNDVLQLAEFGNLNNEPNND DSYASTSKAAAVKNDD  
DKRITKSETSEDEGINDDNITSARLVNGKEET EKDSNKKTLATSTTDKDTKLER  
ESINENDYIDDFDL SLSEIEVNSLPSPLFDLDDEAREELADFDMM LQSAAAPP  
TFHHHHHPHSHQRGAGMQGYVGGGANS AFHRQASGFHHGHHQGRMSLSRGV  
SMEQRLQDIASFFNPISGMGVVGGVSDMPPYPHYPTHYPYSYQSAAGIPAPPQ  
HAQYPPPPPPPHPHPHSHHAMLHANATLGDICTPTQPHYGHNLGSAVTSSMH  
LTNASHDADGGASASAGAAGGNVGAYKMEHDMMYT NASSDMNHTTEGFI  
NSILNDEDLQLMDNDSFCRMVDVNNSTSNSSVLGGGLAAGHASTGGGSA  
TGSIANGLTMSGAGAANSALTGGMTTDLSSGAGATSAGGDRLDASSDSAVS

SMGSERVPSLSDGEWGEGSDSAQDYHQGKYGRPYDYSYNNNSNNRMNDGT  
RQPPVAQKKHQMFGKRFLNEQPGLGAVTARPDNNSNAGGGVNVLPPTGANN  
LLNIGPAQSIKYEYEPYPTVPGQLQQGSGGVNLNADGAMGPALSSKEQQAYDL  
KYGPAVAGAIGGYSLDFAQRPPRTPHEVVQHNHTYTLPPQGTGSMRPQPARDK  
KLSISSKSSKSMNGEEHLTRDEKRARALNIPISVSDIINLPMDEFNERLSKYD  
LTENQLSLIRDIRRRGKNKVAAQNCRKRLDQILSLEDEVKAVRSRKEQLYAD  
RDSLTLERKRISNKFAALHRHIFQYLRDPEGNPCSTSEYSLQQAADGSIYLLRK  
SDATNTGGNASNSSSTSSSSSGSSSSAGGGGGGAAAAAEGVNGHTMRHNG  
VSPQQHAMLGAATHLQQQQQQQTLHHQHHAQTQQQQLSHMHPQQAQQQ  
QQQQQQQQQRQHSAAAAHHHQTTQQKD

>*Musca domestica* (XP\_011293624.1)

MISNKSYAMKMLQLALALSLLHVNPDYLLQQLRNWDSQLELRDGDGWE  
LEMLRAVPMVEYPYANRKSMPLIEDLMYDHSANTQYNVTAYLLNVSNE  
SANQTAAMQEMQAIPPPSSATTTGGSSNSPTSSSSPSSGSLTLENVRNGTTAT  
VSSIVHAAGSSNSNLHNLPTPEIELFLNSESMDQQRSVWEQNLADLNDFNDL  
PIMNSHYGNLPLKDGQQQDPSGHFDLPHLDVFLPTFGSSANALNSEAEGAVAL  
NGSFPNPDDAVGIKLEQLDDEDDKALLVGVMDTRAATCSTLSPDPTDIAVDAC  
IKKEPEEEVVGQTVKEEEVDLSPFIANMELTKEESEIVEVLWKQDVDLGFSLT  
EAQLAELAGSSSATENAVNSEDEIEKLKALEALKLDNPKYDSKDVEDDEDSNQ  
LASNEWTGIPFTIDNETGEYIRLPLDDILNDVIQFAELAGGENDEDDTTGASTS  
KAAAAAANKKILKTDNEDTDNNDNDPTDNHSAKKNPSLDKTLKSEGGDYI  
PDDLENLHTEKQLSKGNKSSDTTKGDANEEDNDDTNNDHDDNDLPQSEIEVS  
SILSPLFDLDDEAKEELADLSMMLHSSAPFAPHHHPHHPHHRGAAGGVVGG  
AQNYGSVNSAFHRQPSSGGFHHGHHQGRMPLSRGVSMEQRLQDIASLFNPIP  
SMGVVGGVSEMSPYPHYPTHPTYQSAPQHAQYPPPPPHPHHHHHAAAAAM  
LHPNASLGLCSTQPHYGHNLSAVSSSMHLTNSTHDSVTVGVGAGAVGGAY  
KMEHDMMYYSNASSDMNHTTDGFINSILNDEDLHLMMDMNVNDSFCRMVDV  
NNSTSNSSVLGLPTGTGHASGAASGGSTAGSTTSGISMSAASNVAASAGAPV  
MTNDLMNATGAATQTVAGGTDRDLASSDSAVSSMGSERVPSLSDGEWGEGS  
DSAQDYHQGKYGGPYDYSYNNNSATNRLNDGSRQPPVAQKKHHMFGKRFMN  
EQPAAANLGAAGSGANGPAAGSNNVGALVHGGAHSAIKYEYEAAYPPVAGLHE  
NMNGHGLDNGAMGGPALSKDHHGYGPGAYSLDFSVRTPRTPHELQHNHTY  
TLPQGTGPLPRPQQRDKKLSTSSSTKSAKSSHNSGSGGEEETYMTRDEKRAR  
AMNIPVCDIINLPMDEFNERLSKYDLSNQLSLIRDIRRRGKNKVAAQNCRK  
RKLDQILSLEDEVKQVRRRKDELNAQRDLFTERKRVSNKFSALHRHIFQYLR  
DPEGNPCSPSEYSLQQAADGSIYLLPRDAANKNDTNSAVGLLNGGAGIGSPLN  
GHSQSMPTAVGHHHSAHPAPGAGGGHNLHQAPHQQTVLHTAAGSLAHSHVQ  
HHHQHHHHQQQHNQTSQPQTTHAHGHHTTTHGGSQQQQPQKD

>*Teleopsis dalmanni* (XP\_037948765.1)

MRSNKSYAIKILQIALALSLLQGDPIYLLQQLRSWDSQLELRDGDGWELEL  
LRAVPMVEYPYANRKTMPLIEDLIRYDRQREKHNHNITAYLLVHNDLATN  
QTAAIQELQATPNAQTVSNPSTGAAGLEHVNAANLASTELNVNASRLSPIPEL

DMFLNLDTAFDPRPIWEQNLANLSDYGDLSGLNHYNGLPLKDEPSSSTYLDV  
YLPNFSDDSLKDIKTEGATALNDTFPNPGDLTSIKNEHSDNNDLNELEALNNL  
ASCSSNSLSQRCIKKEPVDSEKDTNDSDFLTTEESEIVEVLWKQDVDLGFSLT  
SELQLNSNTGESDIDLLKTKQLDSSQQDNEDINKLKALEELKLDKLYDSKDN  
NHDEDIGDEWAGIPFIIDNETGEYIRLPLDELLHDVIQLSELAGKDNEVESDPIA  
STSKAAGVQSNNKQLNKLDFDGKNIEDKDNVDNNNKNNTNNNNNDSNNYKN  
DGELSNEDDLQPSEIEVGLLPSPFLDLDDEAKEELVEDLDRMIQSATPAFHHPH  
HHHPHRPTAAGIQNYAVGSGANS AFHRQATGFHHGHHHQGRVSLSRGVSM  
QRLQDIANFFNPIPSMGVVGGVSDMGGYPHYPTHYPYSYQGATGITAPPQHSQY  
PPPPPHHHGHHTMLHPNATLGDLCSNQPHYGHNLGSAVTSSMHLTNASHDAD  
LGAGATGGSSNAGPYKMEHDLMYYNVSSDINHHTDGFINSILNDEDLHLMD  
MNVTDNFCRMVDINNSTSNSSVLGLASGHTSTGGGSGTNSLSMNGVTNSA  
GSGMTTDLINQGGQVGDRLDASSDSAVSSMGSERVPSLSDGEWGEGSDSAQD  
YHQGKYGGPYDYSYNNNRLNDGTRQPPVAQKKHQMFGKRYMHDQPSITG  
ATAGVNSTAPVNGMTPSNPLLHGPAQSIKYEYEPYTATGLHQNSNGIGLGEGA  
MVPVLNKDQQTYDMKYSNGTLGTYSIDYSIRQPRTTQEIVHHNHSYTLPQGT  
GSLPRPQLRDKKLSTSSSSIKSSKSVSSESEHLTRDEKRARALNIPIAVIDIINLP  
MDEFNERLSKYDLTENQLSLIRDIRRGKNKVAAQNCRKRLDQIVSLEDEV  
KEVRKRKDELQSDLEGLSSARKHISNKFAALHRHIFQYLRDSEGNPCSPSEYSL  
QQAADGSIFLLPRDSSNKTDVANGIAATSSNNNNNSNNSINGGGHLNNSTTTPL  
QHPHVQVAATHQQHSHQHNNHNTQPLSHHSVQLQHQQQQQQQQQQQQHHQ  
HAHHHHQSHRKD

>*Sarcophaga bullata* (TMW53478.1)

MISNKKSAMKMLQLALALSLLHVDPDNYLQQRLRNWDSQLELRDGDGWE  
LEMLRAVPMVEYPYANRKTMMPLIEDLIRFDRQNDHLATQYNITAYLLNVSN  
ESSNQTAALQEMQQLPSTPTTNSAASGSTTTATASASLDPSTVTVSSVVTAPGA  
TNASHLNNFPTSEIELFLNSENFDQQRSVWEQNLADLNDFNDLPIMNSQYGNL  
PLKDGQQDNNLFDLQLDAFLPTFGSSAATAPTSVEGAVALNDTFPNPDEGAGI  
KLEQLDDEDDKALLIGVIDTRTVSALSTDEQALAEFNVKKEPEDSNSDNDNTT  
ANNSEVDLSPFINTVELTKEESEIVEVLWKQDVDLGYSLTPAQLAEADASAKA  
LQQQSTVNDDIEKLKALEALKLDNGKYDPKDIDNDDHLGNEWAGIPFTIDN  
ETGEYIRLPLDEILNDVIQFAELAGEDEDTGASTSKAAAANSKNHLKSKKEEE  
DNNQDSNSTASATKTETDFDEEFKSEGDFKDDLNGEDDKKKKKKKKNKKKYN  
NGIDDEKDNKNSNDNNNKHKINSDDDEVNDDEDDDDDEDSDLQPSEIEVNSL  
PSPLFDLDDEAKEELADLSMMLHSSAPFAPHHHPHHHPHHAHARAGGAGA  
AAGGVGAVQNYGSVNSAFHRQPSSGGFHPGHHQGRMPLSRTVSMEHRFQDI  
ASLFNPMGVVGGVSDISPYSHYPHYTYQTGPQHAQYPPPPPPPHPHHHHA  
AAMLHPNASLGLCSTQPHYGHNLGSAVSSSMHLTNSSHETDVAGVGAGAV  
GGSAYKMEHDMMYYSNASSDMNHTTDGFINSILNDEDLHLMDMNVNDSFC  
RMVDVNSTSNSSVLGIPSGHGNTASGSASGSTSGLSMSSSNIAGAAGASG  
MTSDLMNSVATQGGTDRLDASSDSAVSSMGSERVPSLSDGEWGEGSDSAQDY  
HQGKYGGPYDYSYNNTTNNRLNDGTRQPPVAQKKHHMFGKRFLNEQPGVN  
AANANPAVSTNDVINGPAHSIKYEYEPYPSITVINENSLVNGLEGGAMGGPTLS

KEHHAYGGAYSLDFSMRTPRTPHEIVQHNHTYTLPQGTGSLPRPQQRDKKTISI  
SSSSTKSSKSAHNSSGSGGEEENYLTRDEKRARAMNIPIVTDIINLPMDEFNE  
RLSKYDLSENQLSLIRDIRRGKNKVAAQNCRKRKLDQILSLEDEVKQVRRRK  
EDLQAQRERLRFNERKRVS NKFGALHRHIFQYLRDSDGNPCSPA EYSLQQAAD  
GSIYLLPRDTTIKNETNGVLHGSHTTNGSSQPHHPQMSQNSHVAALHRHHL PQ  
QASTAAVTASSMAHNHAVQH HHHHQQQQQH HHPATQGGQPTHNGHHQPTQH  
GGTAANQQKD

>*Lucilia cuprina* (XP\_046805387.1)

MISNKKYAMKMLQLALALSLLNVDPDNYLQQRLRNWDSQLELRDGDGWEL  
EMLRAVPMVEYPYANRKTMMPLIEDLIRFDRQSDHLANQYNVTAYLLNVSNE  
NSNQTAAMQEMQAIPATSSNNNPSSGSSATTTSSSALDSSSTATVSSVVTAPGAT  
NASHISNFDNSEMELFLNAENFQDQRTVWEQNLADLNDFNLDLPILNSHYGNL  
PLKDGGQQDNNLFDLQLDAFLPTIRSSASTSESEGAVALNDTFPNPDEEVAIKLE  
QLDDEDDKALLMGVMDTRAVTALSTDEVAIKQVSVKKEEPDESAEDSGIEAV  
TDSEVDLSPFINTVELTKEESEIVEVLWKQDVDLGYSLTPAQLADAGTSAKAL  
QSSNANDDDIEKLKALESLKLDNSKYDPKDIDDNDNDDNHLGDEWAGIPFTID  
NETGEYIRLPLDDILNDVIQFAELAGEEEDDTGASTSKAAAANNNNNNSNLLKS  
EKEEQEDEQKSTATIKTTAATKTETDFGKDYKSEGDLKDDLNSDDNNKRKNG  
TGKEDKNKAGSDEDDDDNDSDLPQSEIEVSSLPSPFLDLDDEAKEELADLSM  
MLHSSAPFAPHHHHHPHAHHARAGGAVGGVGGVQNYGGVNSAFHRQPSSG  
GFHHGHHQGRMPSLSRAVSMEHRFQDIASLFNPMGVVGGVSEMSPYPHYPSH  
PYSYQSGPQHAQYPPPPPHPHHHHHAMLPNASLGDLCSSQPHYGHNLGSAV  
SSSMHLTNSTHESDVSGVGAGAVGGSAAANIGAYKMEHDMMYYSNASSDM  
NHTTDGFINSILNDEDLHLMMDMNVNDSFCRMVDVNNSTSNSSVLGISSGHA  
NAATGSANGSTSGISMSGTNVGAAGGAAGMTSDLMNSAGAQQGTDRLDASS  
DSAVSSMGSERVPSLSDGEWGEGSDSAQDYHQGKYGGPYDYSYNNSTSNNR  
LNDGTRQPPVAQKKHHMFGRFLNEQPAVNAANGANPAATGVNGVINGPAH  
SIKYEYEPYPPVAGLHENMDNGLQGGAMGGPTLSKEHHTYGGAYSLDFSVRT  
PRTAHEIVQHNHTYTLPQGSGLPRPQQRDKKTSTSSSSTKSSKSAHNSSGSGG  
EEDNYLTRDEKRARAMNIPIVTDIINLPMDEFNERLSKYDLSENQLSLIRDIRR  
RGKNKVAAQNCRKRKLDQILSLEDEVKQVRRRKEDLQAQRDRRLFNERKRVS  
NKFGALHRHIFQYLRDPEGNPCSPSEYSLQQAADGSIYLLPRDAANKNDTSSG  
VLQHGSTANGSSQPTHHQMSQTHNAHVAGGHHHPHLQQQTTTAATAAAA  
SLAHSHVQPHHHHHHQQQTQQHLHQPGQTTHPHPQTQHNGGGGTAHQQKD

>*Glossina fuscipes* (XP\_037893857.1)

MKTYIYKESEIVEVLWKQDVDLGYSLTSEQSSVNVPSSTS AKAANSDDIEKLK  
ALEELKLDGTKYDTKNPINENDQLDDD WAGIPFTIDNETGEYIRLPLDEILNDV  
IQFAELAGETGEINESSNGASTSAAAAAIVNNQNSIKLKSERDVEQHSDEL TGN  
NNNSAFKSTTTTTTTTLKTIKSEVDVKKEKSIEVSQKDKNNNNNKTESEASTKN  
KGKVEQDGD DDDDDDDDDLTQSEVDSLSPFLDLDDEAKEELADLDMMLHSS  
APFAPHHHPHHPHAHHHPHHHHHHHHHRATGTTGSQNYGGVNSAFHRQPSS T  
GGFHHGHHQSRMPLSRGVSVEQRLQDIASLFNPMGVVGGVSEMSPYSHYPT

HHYSYQSATQHAQYPPPPPPPPPHPHHHHHATVLHPNASLGELCSAQPHYGH  
NLGSAVSSSMHLTNSTHDADISGVGAVGGVSNVGAYKMEHDMLYYSNATSD  
MNHTTDGFINSILNDEDLHLMMDNVNVNDNFCRMVDVNNSTSNSSSVLGLS  
GGHASATGAGPVSSSGLSMSGNNVNAAPGGAATMTSELMVTGSGQTS GDRL  
DASSDSAVSSMGSERVSSLS DGEWGE GSDSAQDYHPGKYGGPYDYSYNSSTT  
NSRLHDGTRQPPVAQKKHHMFGKRFLNEQPPGSNVA AVATASSAANANAGVL  
HGPAQSIKYEYEPYPPAVAGLHQNMGN GIESGAIAPILT NKEHHSYGGGAYSLD  
FSLRPPRTPQELIQHNHTYTLPQGSGSIPRPQVRDKKSSSSTS IKS IKS TNSSGS  
GGEDDVYMT RDEKRARAMNIPIVPDIINLPMDEFNERLSKYDLSENQLSLIR  
DIRRRGKNKVAAQNCRK RKLDQILSLEDEVKQVRRRKDELQQQRDRFLTEHK  
RVS NKFSALHRHIFQYLRDADGNPCSTSEYSLQQASD GSIYLLPRDTSSNNKN  
EALTNMNVNSGILSSTVSANNNNNNSILAPHQIQTSMSATNTHHQQQHTTQVT  
MAHNHLQQQQQQQQHHIHPHHQTQQNQVTATGTVAQTQQSTQTTGNGISGA  
GGGGHYHQPKD

**>*Rhagoletis zephyria* (XP\_017484642.1)**

MVDVNNSTSNSSSVLGSGLTSGHASAGGSSATGSTSNGLAMSAAGAANTALS  
GGMTTDLNSGAGTTAGGDRLDASSDSAVSSMGSERVPSLSDGEWGE GSDSA  
QDYHQGKYGGPYDYSYNNNNRLNDGSRQPPVAQKKHQMFGKRFLNEQPGL  
LGAAGATAGNNNNAGVAPPSSANSLLNVGPAPSIKYEYEPYPTVPVLQPGGTI  
EGALRADGALGPSLSSKEQQAYELKYGPVAADAIGDYTL DFAQRPPRTPHEV  
VQHNHTYTLPQGTGSLPRPQARDKKLSTSSSKSSKSLNAEDEHLTRDEKRAR  
AMNIPIAVSDIINLPMDEFNERLSKYDLTENQLSLIRD IRRRGKNKVAAQNCRK  
RKLDQILSLEDEVKEVRRRKEQLYSDRDSLALERKRISNKFAALHRHIFQYLR  
DPEGNPCSTSEYTLQQAADGSIYLLRKSDATNSGGNASNSSSTSSSSSSSSSSG  
VSGLLNHN GMPPQQQHQSMLSSATHLQQQQQS QSLHHHHHHQAQSQQQQ  
LAHMHTQQAQQSQQQQQQQQQRQHSTHAHAHHHQTHQKD

**>*Drosophila elegans* (XP\_017131181.1)**

MCLNEEYKYMHIYLAESEIAEVLYKQDVDLGFSLDQEAIINASYASGNSGATN  
AKSKLEDEAKSSDPSMSDTGASKDPNVSAENEASSASAEDLEKLKALEELRQ  
DKEKDNENPLEDITNEWNGIPFTIDNETGEYIRLPLDELLNDVLKLSEFPLEDE  
LSNDPVPSTSQAAAAALNENQALRIVSETGEDFLSGEGIPNKQRKVGD KDKDT  
DPEKGE GDSFSVSDFEDLQNSVGSPLFDLDEDAKKELDEMLQSTAPPYHHPHP  
HHGHPHAHPHPHSHHHATMHHAHAHHAHAHAHAHAHQRAVQQANYGGGVGV  
GVGVGVGVGSGTGSAFQRQPAAGGFHHGHHQGRMPRLNRSVSMERLQDFAT  
YFSPIPSMVGGVSEMSPYPHHYPSYSYQASPSNGAPAPGQH GQY GSGAAAPL  
QPPPPPPPPHHAAMLHHPNAALGDICPTGQPHYGHNLGSAVTSSMHLTNSSHE  
ADSAAAAAAYKVEHDLMYYGNTSSDINQTDGFINSIFADEDLHLMMDNESF  
CRMVDNSTSNSSSVLGLPSSGHVSNGSGSSAQLAAGNPHGNQVNGAASGVG  
PMSGSVVGTGAAGMTADLLASGGAGA QGGTDRLDASSDSAVSSMGSERVPS  
LSDGEWGE GSDSAQDYHQGKYGGPYDFS YNNNSRLSTATRQPPVAQKKHQL  
YGKRDPHKQAPS AVPPTAPTA ASTAVQSQSIKYEYDAGYASSGMASGGVASEP  
GAMGPALTKDYHHHQAYGMGASGSTFSGDYTVRPSRPTSQDLVQLNHTYSLP



QGSGLPRPQVRDKKPLVATKTASKGTSAGSSSSGAGGSSGNLEDEHLTRDEK  
RARSLNIPISVHDIINLPMDEFNERLSKYDLSENQLSLIRDIRRRGKNKVAAQN  
CRKRKLDQILTLEDEVHAVVKRKSQNLNQRDHLDSERKRISNKFAMLRHVF  
QYLRDPEGNPCSPDYSLQQAADGSVYLLPREKPEGNSTATSASSAVSAVAGS  
LSGHVPSQAPMHGHSQHGMQAQHVGSMSQQQQQQQSRLPPHLQQQQQQ  
QHHLQSQQQQPGGQQQQHRKE

[illegible]

MANCRFIVKESEIVEVLWKQDVDLGFSLAPPKPKDKSAPQPGSSKNSSEDEAEKL  
KALQDLKDENNESKLNDEGKDDLDDEWAGIPFTIDNETGEYIRLPLQLDELLO  
DVLQLADLNPDEQENHQEPKPNPDVKLITEEKPSTSGSGASSSSSNVVSTSSLS  
DEATIVEPPQSEVEVASAQSELFNLDNADALDELDMMIQSAGSFQHHRPGQN  
YGTNSVFRQSGFHSHHHHQSRLVPLTRGVSMEQRLQDIANLNLPLPAMGVGMG  
VSEMSPYSHYPHYQGGPAIPQHGQFPHPSHHPVLHNASLADLGATQPHY  
GHNLGSVSSSMHLTNSSHETDSGASGYKMEHDMMYYSNTSSELNHTTDGFI  
NSILNDEDLQLMDMGVSEGFCTMRMLEGNTTSNNSSVLGSSGASHGSHMLS  
MPTNLGNLSNEVIGASTGDRDLASSDSAVSSMGSERVPSLSDGEWGDAGSDS  
AQDYHQGKYGGPYDYSYNGRLGGDSSRQQPVAQKKHQMFQKRYFQEQPNIP  
SLPQPSSTTQPPSDHLPPVPVKYEYDAYGMHPSGAASIASSLEGAVGPIVNDKH  
VPLMTNAEMKYACSLDFSRPPRGSGPAHDLISHNHTYTLPPQSGSVPRPQIRD  
KKOKRSEDEHMTREKRRALNIPISVNDIINLPMDEFNERLSKYDLNETOLS

LIRDIRRRGKNKVAAQNCRKRKLDQILSLEDEVKEVRRRKERLFQERDIILAER  
KRIASKFATLHRHVFQYLRDSDGNPCSPSQYSLQQAADGSVYLLRRENNKPE  
NNTTTNHSGHHHHSSSQGPQPPSSSSQHQKD

>*Aedes aegypti* (XP\_021693907.1)

MAALEYEDLPRMQSLTPEPDDTGSLKDGMGAPEFEQQQQQATTQVVVIGGD  
SSCNLADDCCNDKPNSCDHDEVGYHSPLYNYSKYNLKEMDLIEVLWKQDVD  
LGFTLTPLTVPSGASGGATSGMATKGATSAEDSSDDLEKLKVLLEIKHDDDDKK  
KDNADKQAEENPWAGMSYTVDIETGEYVLNATDGSEATLPPPLADLFLEEGL  
NLPELINDTVIEETEEPAKKKTAEQEEEEEESEVKRIERELESSADELCQGAAAS  
VSATSGSTSASPCDLNICSEQQATATSSVVDREQQDSPNHPEAAGAASPDDLED  
ILCDMMIQTSSSHFQHPRQPMQNYGHGMHGSLRQGGYHHHHHHHHHHSRVP  
LSRAVSMEQRFQDLANLLSFPPGMGVGMGVGEMPPAHPHPHYPPHYSYQAN  
GAIPQHGGYHSHAVLQNASLADIGPTQPYYAPNLGSAVATSMHLTNSTSETDA  
GATGYKMDHEMMYYSNTSSEMNHDTGFLNSILDDDLQLMDIAVNEGMYTM  
RMLDHNATSSNSSVLGGS LGGSAAAVAAAAAAGLNGPAHLGGLMSSASAAV  
SSGAMQTS LNGSTGTHGATGGTTS GDRLDASSDSAVSSMGSERVPSLSDGEW  
GDGGSDSAQEYHNKYGGPFDYSYSGSNRLGDGTRQPPVAQKKHHMFAKRYF  
QEQNTSIPSLPSATNPSATGPTVDPQSQLNASIPIKYEFDYMNPA SLSHLEGAVG  
PVTQKQEDQTSAHNNPLSSVDMKYPYSLDFSRQNPASAPAARSHHHDVHHNH  
TYTLPHNSGANPKPQTRDKRIRKAEEEHLTRDEKRARALQIPIPVQDIINLPM  
EFNERLSKYDLSETQLSLIRDIRRRGKNKVAAQNCRKRKLDQIVTLADEVKD  
MKMRKERLLRDREIIQTERKRIRDKFSALYRHVFQNLRDSEGNPYSQEHWSL  
QQSADGTVVLVPRSVDRQQDLTGSNHQQQQQQQLGMAGGSGLP SHHQQQH  
LLHLQQHQHPHSQQQH HHGGSSSGSNSTNSSGASGGSQHRPKE
