# Supplementary material for: Molecular Cloning and Expression Profiling of CncC in Bactrocera dorsalis Hendel
Source: Insects. 2022 Aug 30;13(9):785. doi: 10.3390/insects13090785 (PMC9503647; doi:10.3390/insects13090785)
Supplement: Supplementary file 1 [file insects-13-00785-s001.zip]

Archive with 4 entries (4 files):
- Figure S1 Multiple sequence alignment of conserved regions of insect CncC and Nrf2 from other species.pdf
- Figure S2 Multiple sequence alignment of conserved regions of CncC of diptera.pdf
- Table S1 Sequences of insect CncC and Nrf2 from other species for the phylogenetic analysis.pdf
- Table S2 Sequences of diptera CncC for the phylogenetic analysis .pdf
